# Supplementary material for: Balance between macrophage migration inhibitory factor and sCD74 predicts outcome in patients with acute decompensation of cirrhosis
Source: PubMed Central journal article supplement — JHEP Rep. 2020 Dec 17;3(2):100221. doi: 10.1016/j.jhepr.2020.100221 (PMC7890204; doi:10.1016/j.jhepr.2020.100221), 2020-12-17
Supplement: mmc1.pdf [file mmc1.pdf]

# **Balance between macrophage migration inhibitory factor and sCD74 predicts outcome in patients with acute decompensation of cirrhosis**

Theresa H. Wirtz, Philipp A. Reuken, Christian Jansen, Petra Fischer, Irina Bergmann, Christina Backhaus, Christoph Emontzpohl, Johanna Reißing, Elisa F. Brandt, M. Teresa Koenen, Kai M. Schneider, Robert Schierwagen, Maximilian J. Brol, Johannes Chang, Henning W. Zimmermann, Nilay Köse-Vogel, Thomas Eggermann, Ingo Kurth, Christian Stoppe, Richard Bucala, Jürgen Bernhagen, Michael Praktiknjo, Andreas Stallmach, Christian Trautwein, Jonel Trebicka, Tony Bruns, Marie-Luise Berres

## Table of contents

|               |   |
|---------------|---|
| Table S1..... | 2 |
| Table S2..... | 4 |
| Table S3..... | 5 |
| Table S4..... | 6 |
| Table S5..... | 7 |

**Table S1. Baseline characteristics and causes of death in patients with acute decompensation of cirrhosis without ACLF**

|                                        | <b>Stable<br/>Decompensated<br/>Cirrhosis<br/>(n=79)</b> | <b>Unstable<br/>Decompensated<br/>Cirrhosis<br/>(n=68)</b> | <b>Pre-ACLF<br/>(n=67)</b> | <b>P value</b> |
|----------------------------------------|----------------------------------------------------------|------------------------------------------------------------|----------------------------|----------------|
| <b>Age (yrs)</b>                       | 57 (50-67)                                               | 58 (50-66)                                                 | 63 (56-70)                 | 0.004          |
| <b>Male sex (%)</b>                    | 63 (80%)                                                 | 45 (66%)                                                   | 50 (75%)                   | 0.18           |
| <b>HCC at baseline (%)</b>             | 13 (16%)                                                 | 7 (10%)                                                    | 16 (24%)                   | 0.12           |
| <b>Alcoholic liver<br/>disease (%)</b> | 67 (85%)                                                 | 54 (79%)                                                   | 47 (70%)                   | 0.10           |
| <b>Child Pugh C (%)</b>                | 51 (65%)                                                 | 31 (46%)                                                   | 38 (57%)                   | 0.07           |
| <b>MELD score</b>                      | 15 (11-19)                                               | 13 (10-17)                                                 | 16 (12-21)                 | 0.02           |
| <b>SBP at baseline (%)</b>             | 6 (8%)                                                   | 4 (6%)                                                     | 13 (19%)                   | 0.03           |
| <b>Bilirubin (µmol/L)</b>              | 40 (22-81)                                               | 28 (18-52)                                                 | 42 (19-82)                 | 0.02           |
| <b>INR</b>                             | 1.4 (1.2-1.6)                                            | 1.3 (1.2-1.5)                                              | 1.4 (1.2-1.6)              | 0.52           |
| <b>Creatinine (µmol/L)</b>             | 72 (61-108)                                              | 77 (59-109)                                                | 103 (72-140)               | <0.001         |
| <b>WBC [/nl]</b>                       | 6.6 (5.3-9.4)                                            | 5.8 (4.1-8.9)                                              | 6.7 (5.1-9.2)              | 0.08           |
| <b>CRP [mg/l]</b>                      | 28.4 (12.7-54.0)                                         | 23.8 (10.6-52.8)                                           | 34 (23.7-62.1)             | 0.03           |

|                                           |                   |                   |                  |        |
|-------------------------------------------|-------------------|-------------------|------------------|--------|
| <b>MIF [ng/ml]</b>                        | 2.6 (0.0-28.12)   | 2.87 (0.0-69.16)  | 3.88 (0.0-70.56) | 0.54   |
| <b>sCD74 [ng/ml]</b>                      | 76.91 (0.0-663.4) | 41.29 (0.0-528.6) | 32.63 (0.0-1237) | 0.07   |
| <b>Causes of death<br/>within 90 days</b> |                   |                   |                  |        |
| ACLF                                      | 0                 | 1                 | 33               | <0.001 |
| Malignancy                                | 2                 | 1                 | 2                |        |
| Other                                     | 0                 | 2                 | 1                |        |
| Unknown                                   | 3                 | 1                 | 1                |        |

Baseline characteristics are depicted as frequencies or medians with interquartiles. *P* values are based on Kruskal-Wallis test for continuous and Fisher's exact test for categorical variables. Abbreviations: HCC hepatocellular carcinoma; SBP spontaneous bacterial peritonitis, WBC white blood cell count, CRP C-reactive protein.

**Table S2. Baseline characteristics of patients with compensated cirrhosis (n=41)**

|                                                  | <b>Compensated cirrhosis<br/>(n=41)</b> |
|--------------------------------------------------|-----------------------------------------|
| <b>Age (yrs)</b>                                 | 63 (56-70)                              |
| <b>Male sex (%)</b>                              | 19 (46%)                                |
| <b>HCC at baseline (%)</b>                       | 11 (27%)                                |
| <b>Alcoholic liver disease (%)</b>               | 10 (24%)                                |
| <b>MELD score</b>                                | 7 (6-9)                                 |
| <b>Bilirubin (<math>\mu\text{mol/L}</math>)</b>  | 14 (11-18)                              |
| <b>INR</b>                                       | 1.1 (1.0-1.1)                           |
| <b>Creatinine (<math>\mu\text{mol/L}</math>)</b> | 69 (62-82)                              |
| <b>WBC [/<math>\text{nl}</math>]</b>             | 5.4 (4.7-7.6)                           |
| <b>CRP [mg/l]</b>                                | 2.6 (2.0-6.2)                           |
| <b>MIF [ng/ml]</b>                               | 2.45 (1.07-5.86)                        |

Baseline characteristics are depicted as frequencies or medians with interquartiles.

Abbreviations: HCC hepatocellular carcinoma; SBP spontaneous bacterial peritonitis,

WBC white blood cell count, CRP C-reactive protein.

**Table S3. SNP -173C C/C genotype correlates with lower sCD74 serum level.**

|                                                       |                         | Serum MIF [ng/ml]            |         | Serum sCD74 [ng/ml]          |         |
|-------------------------------------------------------|-------------------------|------------------------------|---------|------------------------------|---------|
|                                                       | No. of patients (n=292) | Median (interquartile range) | P value | Median (interquartile range) | P value |
| <b>MIF promoter SNP -173C</b>                         |                         |                              |         |                              |         |
| GG                                                    | 205                     | 3.1 (1.7-7.5)                |         | 56.8 (8.7-128.1)             | 0.003   |
| GC                                                    | 63                      | 3.2 (1.4-6.5)                |         | 23.1 (4.2-65.6)              |         |
| CC                                                    | 19                      | 2.5 (1.4-5.2)                | 0.57    | 16.3 (0.0-69.1)              |         |
| <b>MIF promoter microsatellite CATT<sub>5-8</sub></b> |                         |                              |         |                              |         |
| Both alleles <7 repeats                               | 213                     | 3.1 (1.7-7.5)                |         | 50.8 (7.2-115.0)             |         |
| Any allele ≥ 7 alleles                                | 62                      | 2.6 (1.2-5.2)                | 0.13    | 27.9 (1.2-81.7)              | 0.07    |

Analysis of MIF and sCD74 serum level and genotypes of MIF promoter

polymorphisms SNP -173C and microsatellite CATT<sub>5-8</sub>. Absolute patient numbers and medians with interquartiles are shown. *P* values are related to Kruskal-Wallis test for continuous variables; bold value indicates *P* < .05.

**Table S4. Genotypes of MIF promoter polymorphisms SNP -173C and microsatellite CATT<sub>5-8</sub> do not correlate with 90-days transplant free survival**

|                                                       | Follow-up at 90 days                       |                                                 |                | Univariate Cox regression model |                |
|-------------------------------------------------------|--------------------------------------------|-------------------------------------------------|----------------|---------------------------------|----------------|
|                                                       | No of patients dead or transplanted (n=93) | No of patients alive without transplant (n=199) | <i>P</i> value | Hazard ratio (95% CI)           | <i>P</i> value |
| <b>MIF promoter SNP -173C</b>                         |                                            |                                                 |                |                                 |                |
| GG                                                    | 68                                         | 137                                             | 0.71           | 1.00 (reference)                | 0.65           |
| GC                                                    | 17                                         | 46                                              |                | 0.78 (0.46-1.33)                |                |
| CC                                                    | 6                                          | 13                                              |                | 1.01 (0.44-2.33)                |                |
| <b>MIF promoter microsatellite CATT<sub>5-8</sub></b> |                                            |                                                 |                |                                 |                |
| Both alleles <7 repeats                               | 72                                         | 141                                             | 0.17           | 1.00 (reference)                | 0.21           |
| Any allele ≥ 7 alleles                                | 15                                         | 47                                              |                | 0.70 (0.40-1.22)                |                |

Univariate Cox proportional hazards regression analysis of MIF promoter polymorphisms SNP -173C and microsatellite CATT<sub>5-8</sub> and 90-days transplant-free mortality.

**Table S5. Baseline characteristics of patients undergoing transjugular intrahepatic portosystemic stent shunting (n=96).**

|                              |            |
|------------------------------|------------|
| <b>Age (years)</b>           | 52 (36-77) |
| <b>Sex</b>                   |            |
| Male                         | 64 (67%)   |
| Female                       | 32 (33%)   |
| <b>CHILD Pugh Score</b>      |            |
| A                            | 17 (17%)   |
| B                            | 65 (66%)   |
| C                            | 16 (17%)   |
| <b>Etiology of cirrhosis</b> |            |
| Alcohol                      | 47 (75%)   |
| Viral hepatitis              | 7 (11%)    |
| AIH/PSC/PBC                  | 2 (3%)     |
| cryptogenic                  | 7 (11%)    |
| <b>Indication for TIPS</b>   |            |
| Variceal Bleeding            | 39 (40%)   |
| Ascites                      | 43 (44%)   |
| Bleeding + ascites           | 8 (8%)     |
| Hepatorenal syndrome         | 7 (7%)     |

Baseline characteristics are depicted as frequencies and percentages.
