# Supplementary material for: Balance between macrophage migration inhibitory factor and sCD74 predicts outcome in patients with acute decompensation of cirrhosis
Source: PubMed Central journal article supplement — JHEP Rep. 2020 Dec 17;3(2):100221. doi: 10.1016/j.jhepr.2020.100221 (PMC7890204; doi:10.1016/j.jhepr.2020.100221), 2020-12-17
Supplement: mmc2.pdf [file mmc2.pdf]

## JHEP Reports

### CTAT methods

Tables for a “Complete, Transparent, Accurate and Timely account” (CTAT) are now mandatory for all revised submissions. The aim is to enhance the reproducibility of methods.

- Only include the parts relevant to your study
- Refer to the CTAT in the main text as ‘Supplementary CTAT Table’
- Do not add subheadings
- Add as many rows as needed to include all information
- Only include one item per row

If the CTAT form is not relevant to your study, please outline the reasons why:

|  |
|--|
|  |
|--|

#### 1.1 Antibodies

| Name                                 | Citation | Supplier                                         | Cat no. | Clone no. |
|--------------------------------------|----------|--------------------------------------------------|---------|-----------|
| Mouse anti-human MIF mAb             | [1]      | R&D Systems<br>Wiesbaden-Nordenstadt,<br>Germany | MAB289  | #12302    |
| biotinylated goat anti-human MIF pAb | [1]      | R&D Systems<br>Wiesbaden-Nordenstadt,<br>Germany | BAF289  | #932606   |
| Anti-CD74 antibody                   | [2]      | Santa Cruz                                       | SC-5438 | C-16      |
| Anti-CD74 detection antibody         | [2]      | Santa Cruz                                       | SC-6262 | LN-2      |

#### 1.2 Cell lines

| Name | Citation | Supplier | Cat no. | Passage no. | Authentication test method |
|------|----------|----------|---------|-------------|----------------------------|
| -    | -        | -        | -       | -           | -                          |

#### 1.3 Organisms

| Name | Citation | Supplier | Strain | Sex | Age | Overall n number |
|------|----------|----------|--------|-----|-----|------------------|
| -    | -        | -        | -      | -   | -   | -                |

#### 1.4 Sequence based reagents

| Name | Sequence | Supplier |
|------|----------|----------|
| -    | -        | -        |

## 1.5 Biological samples

| Description | Source | Identifier |
|-------------|--------|------------|
| -           | -      | -          |

## 1.6 Deposited data

| Name of repository | Identifier | Link |
|--------------------|------------|------|
| -                  | -          | -    |

## 1.7 Software

| Software name       | Manufacturer                 | Version |
|---------------------|------------------------------|---------|
| GraphPad            | GraphPad, San Diego, CA, USA | 5.01    |
| IBM SPSS Statistics | IBM Corp., Armonk, NY, USA   | 25      |

## 1.8 Other (e.g. drugs, proteins, vectors etc.)

|   |   |   |
|---|---|---|
| - | - | - |
|---|---|---|

## 1.9 Please provide the details of the corresponding methods author for the manuscript:

Theresa H. Wirtz, MD; Medical Department III, RWTH Aachen University Hospital, Pauwelsstr. 30, 52074 Aachen, Germany, thwirtz@ukaachen.de; Tel.: +49-241-80-80861; Fax: +49-241-80-82455

## 2.0 Please confirm for randomised controlled trials all versions of the clinical protocol are included in the submission. These will be published online as supplementary information.

No RCT

[1] Strussmann T, Tillmann S, Wirtz T, Bucala R, von Hundelshausen P, Bernhagen J. Platelets are a previously unrecognised source of MIF. *Thrombosis and haemostasis* 2013;110:1004-1013.

[2] Assis DN, Leng L, Du X, Zhang CK, Grieb G, Merk M, et al. The role of macrophage migration inhibitory factor in autoimmune liver disease. *Hepatology* 2014;59:580-591.
